# Supplementary material
Source: PubMed Central journal article supplement (PMC3966110)

**Amplification and overexpression of *MAP3K3* gene in human breast cancer  
promotes formation and survival of breast cancer cells**

**Running Title:** MAP3K3 amplification in human breast cancer

**Keywords:** MAP3K3, kinase, oncogene, breast cancer

Yihui Fan<sup>1,2,11</sup>, Ningling Ge<sup>1,2,8,11</sup>, Xiaosong Wang<sup>3,4,11</sup>, Wenjing Sun<sup>1,2,11</sup>, Renfang Mao<sup>5</sup>, Wen Bu<sup>3</sup>, Chad J. Creighton<sup>4</sup>, Pingju Zheng<sup>3</sup>, Sanjeev Vasudevan<sup>6</sup>, Lei An<sup>5</sup>, Jinshu Yang<sup>7</sup>, Yi-Jue Zhao<sup>1,2</sup>, Huiyuan Zhang<sup>9</sup>, Xiao-Nan Li<sup>1,2</sup>, Pulivarthi H. Rao<sup>1,2</sup>, Eastwood Leung<sup>1,2</sup>, Yong-Jie Lu<sup>7</sup>, Joe W. Gray<sup>10</sup>, Rachel Schiff<sup>3</sup>, Susan G. Hilsenbeck<sup>3,4</sup>, C. Kent Osborne<sup>3,4</sup>, Jianhua Yang<sup>1,2,4</sup>, Hong Zhang<sup>5,9,\*</sup>

## **Supplementary Materials and Methods**

### **Analysis of paired-end transcriptome sequencing data**

Mate pair transcriptome reads were mapped to the human genome (hg18) and Refseq transcripts using Burrows-Wheeler Aligner ( Li H, Bioinformatics 2009; 25: 1754-1760 ). Chimerical sequences were extracted based on the approach applied in our previous study ( Wang XS , Nat Biotechnol 2009; 27: 1005-1011 ) .

### **Quantitative RT-PCR, genomic PCR and sequencing**

RNAs from breast cancer cell lines were reverse-transcribed using the Transcriptor First Strand cDNA Synthesis Kit (Roche Applied Science, Penzberg, Germany) and random plus oligo-dT primers. Polymerase chain reaction was performed using MYO15B-MAP3K3 specific fusion primers for 35 cycles. The primers are listed in Supplementary Table 1. The PCR product was purified and sequenced (by capillary sequencing) bidirectionally using both forward and reverse primers.

100 ng of total RNA isolated using Trizol (Invitrogen, Carlsbad, CA) was used for quantitative RT-PCR to detect the mRNA levels of MAP3K3 and GAPDH (internal control) with one-step SYBR Green real-time qRT-PCR kit (Qiagen, Valencia, CA) following the manufacturer's protocol. The specific primers for MAP3K3 were 5'-GTTGAAGGCTTACGGTGCTC-3' and 5'-ACATTCCCAGCAGAGTCTCG-3'. The primers for GAPDH were 5'-AAGGTGAAGGTCGGAGTCAA-3' and 5'-TGGACTCCACGACGTACTCA-3'. The mRNA level of MAP3K3 in each sample was normalized to GAPDH and the relative expression level of MAP3K3 is

represented as fold change relative to MCF-10A. 100 ng of genomic DNA extracted cells using standard protocol was used for real-time qPCR to detect the genomic DNA level of MAP3K3 with SYBR Green real-time qPCR kit from Qiagen. The specific primers for MAP3K3 genomic DNA were: 5'-GAGAACATGGGTCTGGCTGT-3' and 5'-CTTGGTTGGCACATTCCTCT-3'. Copy number was calculated relative to normal breast tissue control in patient specimens. Each sample was determined from triplicate reactions.

### **Immunoblotting**

Cells or tumors were scraped into cold PBS buffer, pelleted and lysed in protein lysis buffer (25 mM HEPES, pH 7.7, 135 mM NaCl, 3 mM EDTA, 1% Triton X-100, 25 mM  $\beta$ -glycerophosphate, 0.1 mM sodium orthovanadate, 0.5 mM phenylmethylsulfonylfluoride, 1 mM dithiothreitol, 10  $\mu$ g/ml aprotinin, 10  $\mu$ g/ml leupeptin, 1 mM Benzimidazole, 20 mM disodium *p*-nitrophenylphosphate, 1 mM phenylmethylsulfonyl fluoride) on ice for 30 minutes, clarified by centrifugation at 15,000 g for 10 minutes at 4°C. Equal amounts of protein in the supernatants (100  $\mu$ g) were subjected to 10% SDS-PAGE and blotted onto nitrocellulose membranes. Membranes were probed with the antibodies as indicated. Proteins were visualized using the ECL detecting system (Amersham Biosciences).

### **Colony formation assay**

Aliquots of  $1 \times 10^4$  cells were mixed with a final concentration of 0.3% Sea Plaque agarose (Hoefer Scientific Instruments, San Francisco, CA) and DMEM containing 12% FBS and were overlaid on a 0.5% agarose layer containing DMEM and 12% FBS in 6-well plates. The plates were put in a humidified incubator at 37°C with 5%

CO<sub>2</sub> for 2 weeks. Each well was stained with 0.5 ml 5 mg/ml sterile-filtered MTT solution for 4 hours and stained colonies ( $\geq 15$  mm) were counted. All samples were assayed in triplicate.

### Statistical analyses

Comparisons of RT-PCR data, proliferation, colony formation, and apoptosis were analyzed using two-tailed student t tests. The p values of 0.05 or less were defined as statistically significant. Error bar represents standard deviations or standard error of the mean.

**Supplementary Table 1. Reverse transcription PCR primers specific to MYO15B-MAP3K3 fusion**

| Primers              | Type    | Sequence (5'→3')          |
|----------------------|---------|---------------------------|
| MYO15B-<br>MAP3K3_F1 | Forward | AGCATTGGCACCGTCACTGTTCG   |
| MYO15B-<br>MAP3K3_R1 | Reverse | CCTGTCCAAGGATTGGCAGCTTCCA |
| MYO15B-<br>MAP3K3_F2 | Forward | ACTGTTCGTGGATGCCTACGGCT   |
| MYO15B-<br>MAP3K3_R2 | Reverse | TGTCTGCTGACCTGTCCAAGGATT  |
| MYO15B-<br>MAP3K3_F3 | Forward | AGAACCAATGCACGGCTGGCAC    |
| MYO15B-<br>MAP3K3_R3 | Reverse | AATTTTCTGCACTGCTCAGGGGATC |

## Supplemental Figure Legends

**Figure S1.** *MAP3K3* is amplified and overexpressed in breast cancer cell lines.

(A) Representative FISH images of *MAP3K3* in *MAP3K3* non-amplified MDA-MB-435 cells. (B) Summary of important breast cancer biomarkers in the above analyzed breast cancer cell lines. (C) The gene copy number of *MAP3K3* in Luminal and Basal B subtypes is higher than it in Basal A subtype. (D) The mRNA level of *MAP3K3* in Luminal and Basal B subtypes is higher than that in Basal A subtype.

**Figure S2.** *MAP3K3* is not associated with ER, PR, or HER2 in human breast cancers. Data were collected and analyzed using OncoPrint (<https://www.oncoprint.com>). After OncoPrint datasets were filtered for breast cancer, clinical specimen, > 151 samples, mRNA, and with ER, PR, and HER2 status, the Bittner Breast dataset (n=336) met all these criteria. Relative *MAP3K3* expression levels are shown among samples with No value (0), Positive (1), or Negative (2) expression of ER, PR, and HER2. P values were derived by ANOVA.

**Figure S3.** Identification of *MYO15B-MAP3K3* gene fusion in the MDA-MB-453 breast carcinoma cell line.

(A) Representative copy number data show high-level amplifications and unbalanced rearrangements at the *MAP3K3* locus in primary breast cancer tissues (data from The

Cancer Genome Atlas) and cell lines (data from Dr. Joe Gray). Relative quantifications of copy number data for paired tumor and normal tissues are shown. Copy number data are visualized by Integrative Genomics Viewer (IGV). (B) RT-PCR validation of *MYO15B-MAP3K3* gene fusion in MDA-MB-453. Two negative controls (MDA-MB-361 and MCF-7) were included in the analysis. At the right is the capillary sequencing result of the PCR products (primers F1 and R1 as shown in Supplementary Table 1). The sequence of *MYO15B* is shown in brown color and that of *MAP3K3* in green color. (C) A diagram showing fusion of exon 9 of *MYO15B* with exon 7 of *MAP3K3*.

**Figure S4.** The effect of knockdown of *MAP3K3* expression on cell proliferation and colony formation in MCF-7, MDA-MB-361 and MDA-MB-231 breast cancer cells.

(A) Colony assay showing reduced colony formation in *MAP3K3*-knockdown MCF-7 cells (Day 14). (B) Quantification of mean colony numbers in (A). Error bars represent standard deviation from triplicate samples. (C) Colony assay in *MAP3K3*-knockdown MDA-MB-231 cells (Day 14). (D) Quantification of mean colony numbers in (C). Error bars represent standard deviation from triplicate samples. (E) Immunoblotting analysis confirming *MAP3K3* knockdown in MDA-MB-361 cells. (F) Cell growth assay showing reduced growth of *MAP3K3* knockdown cells. Cell Counting Kit-8 (CCK-8) was used to determine relative cell numbers. Error bars represent standard deviation from triplicate samples. (G) Colony formation assay showing reduced colony forming potential of *MAP3K3*-knockdown cells. After 14 days of growth, the colonies were stained with MTT. (H) Quantification of mean colony numbers in (G). Error bars represent standard deviation from triplicate

samples. \* $<0.05$ , \*\*  $P<0.01$ , t-test. Results from (E) and (G) are representative of three independent experiments.

**Figure S5.** The effect of knockdown of MAP3K3 expression on Dox- and VP16-induced cell death in MDA-MB-468 and MDA-MB-453 cells.

(A, B) Quantification of cell numbers (by CCK-8) of MDA-MB-468 (A) and MDA-MB-453 (B) cells in cell cultures treated with the indicated concentrations of doxorubicin. (C, D) Quantification of cell numbers (by CCK-8) of MDA-MB-468 (C) and MDA-MB-453 (D) cells in cell cultures treated with the indicated concentrations of VP-16.

# Figure S1

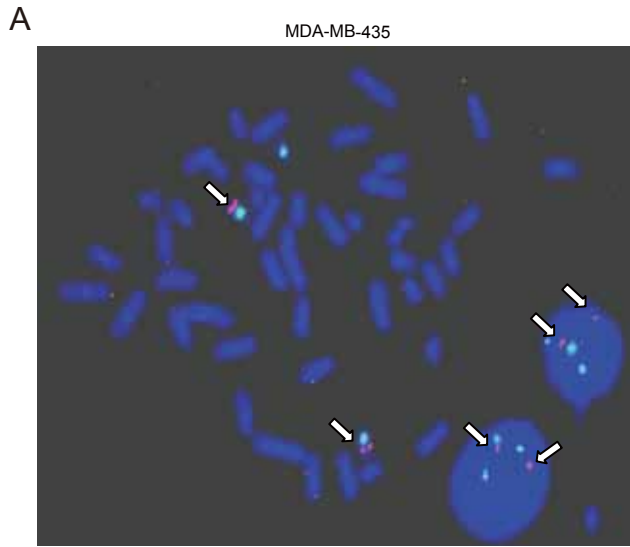

**B**

| Cell line  | ER | PR | HER2 | TP53   | MAP3K3        |           |               |
|------------|----|----|------|--------|---------------|-----------|---------------|
|            |    |    |      |        | Amplification | RNA level | Protein level |
| MCF-10A    | +  | +  | -    | WT     | No            | Low       | Low           |
| MCF-7      | +  | +  | -    | WT     | Yes           | High      | High          |
| MDA-MB-361 | +  | +  | +    | Mutant | Yes           | High      | High          |
| MDA-MB-231 | -  | -  | -    | Mutant | No            | Low       | High          |
| MDA-MB-468 | -  | -  | -    | Mutant | no            | Low       | Low           |
| SK-BR-3    | -  | -  | +    | Mutant | No            | Low       | High          |

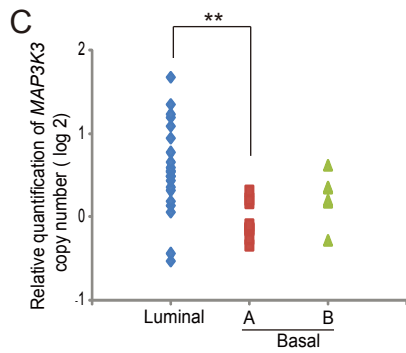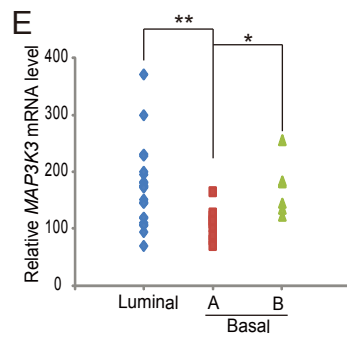



Figure S2

**A** No correlation between MAP3K3 mRNA expression and ER (P=0.39)

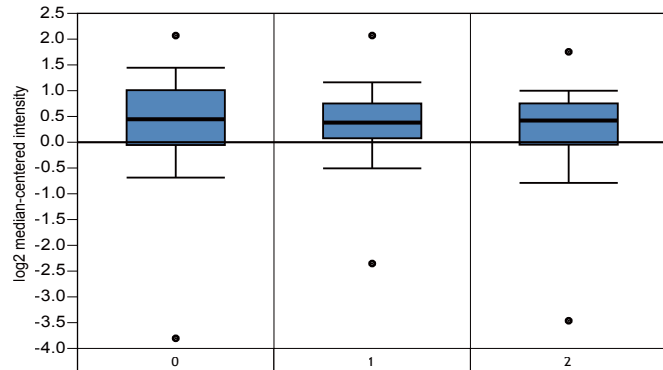

**B** No correlation between MAP3K3 mRNA expression and PR (P=0.49)

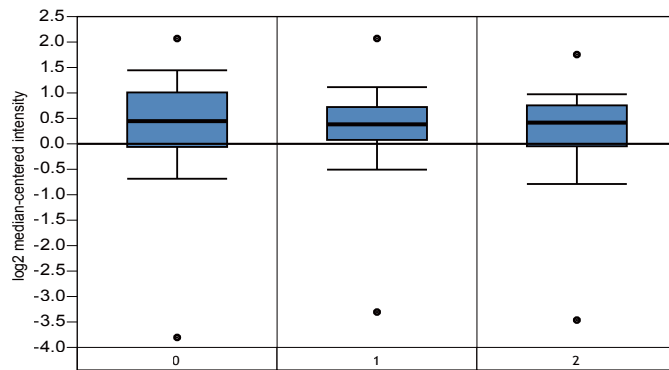

**C** No correlation between MAP3K3 mRNA expression and HER2 (P=0.55)

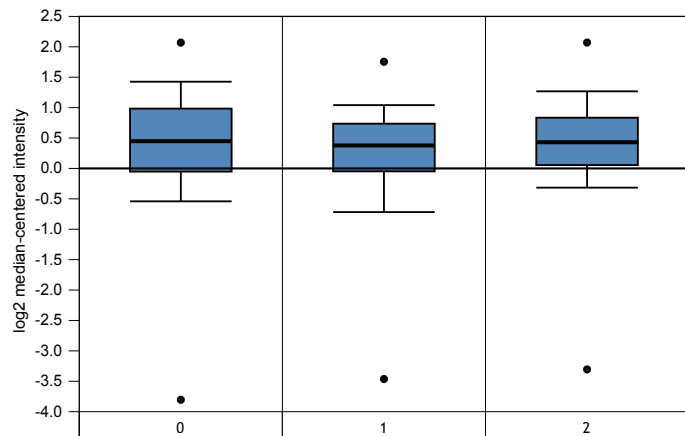

Figure S3

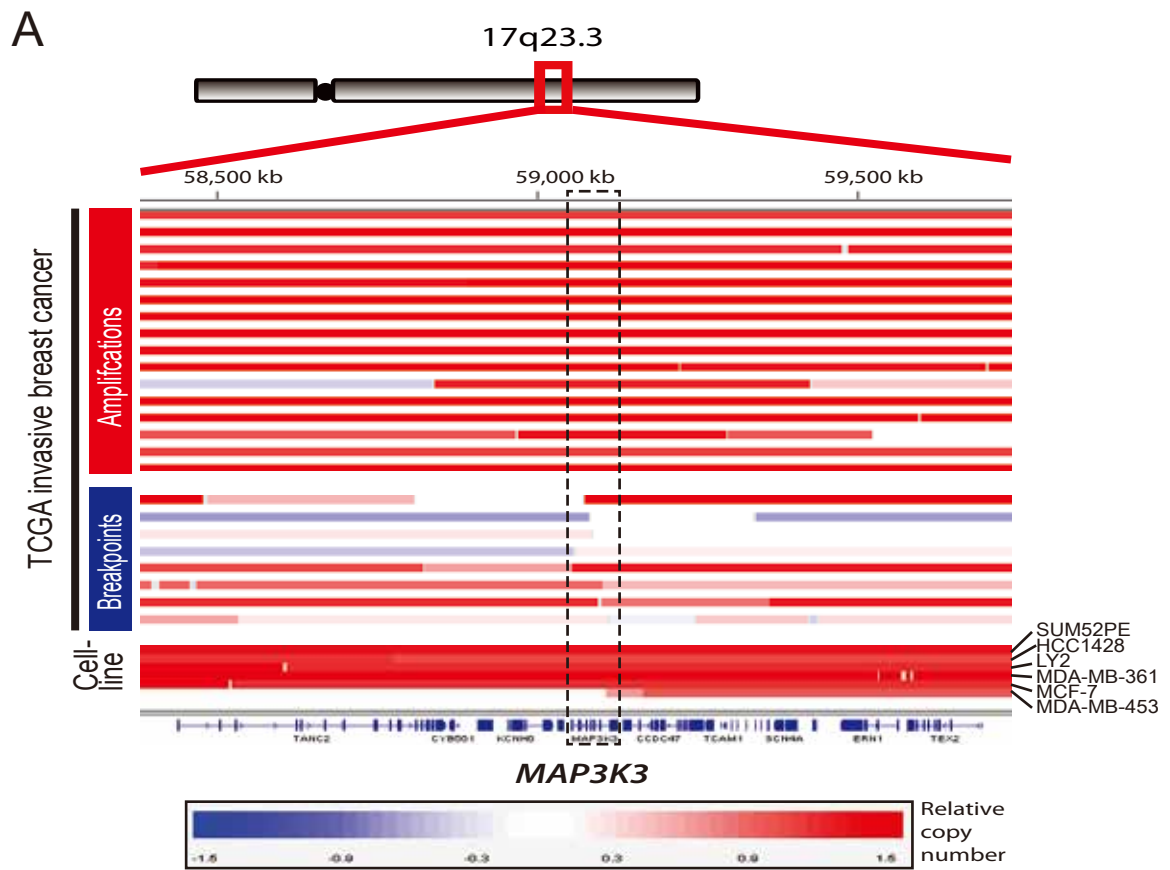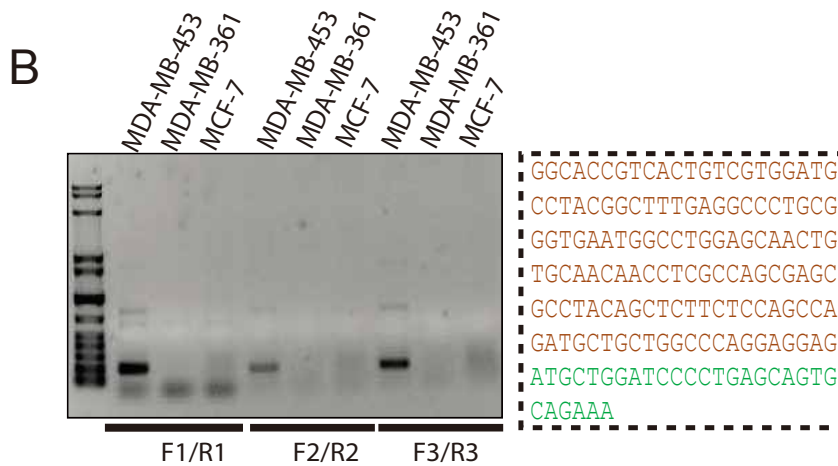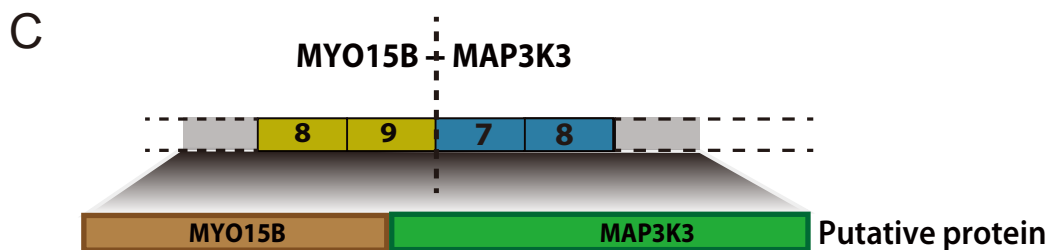

Figure S4

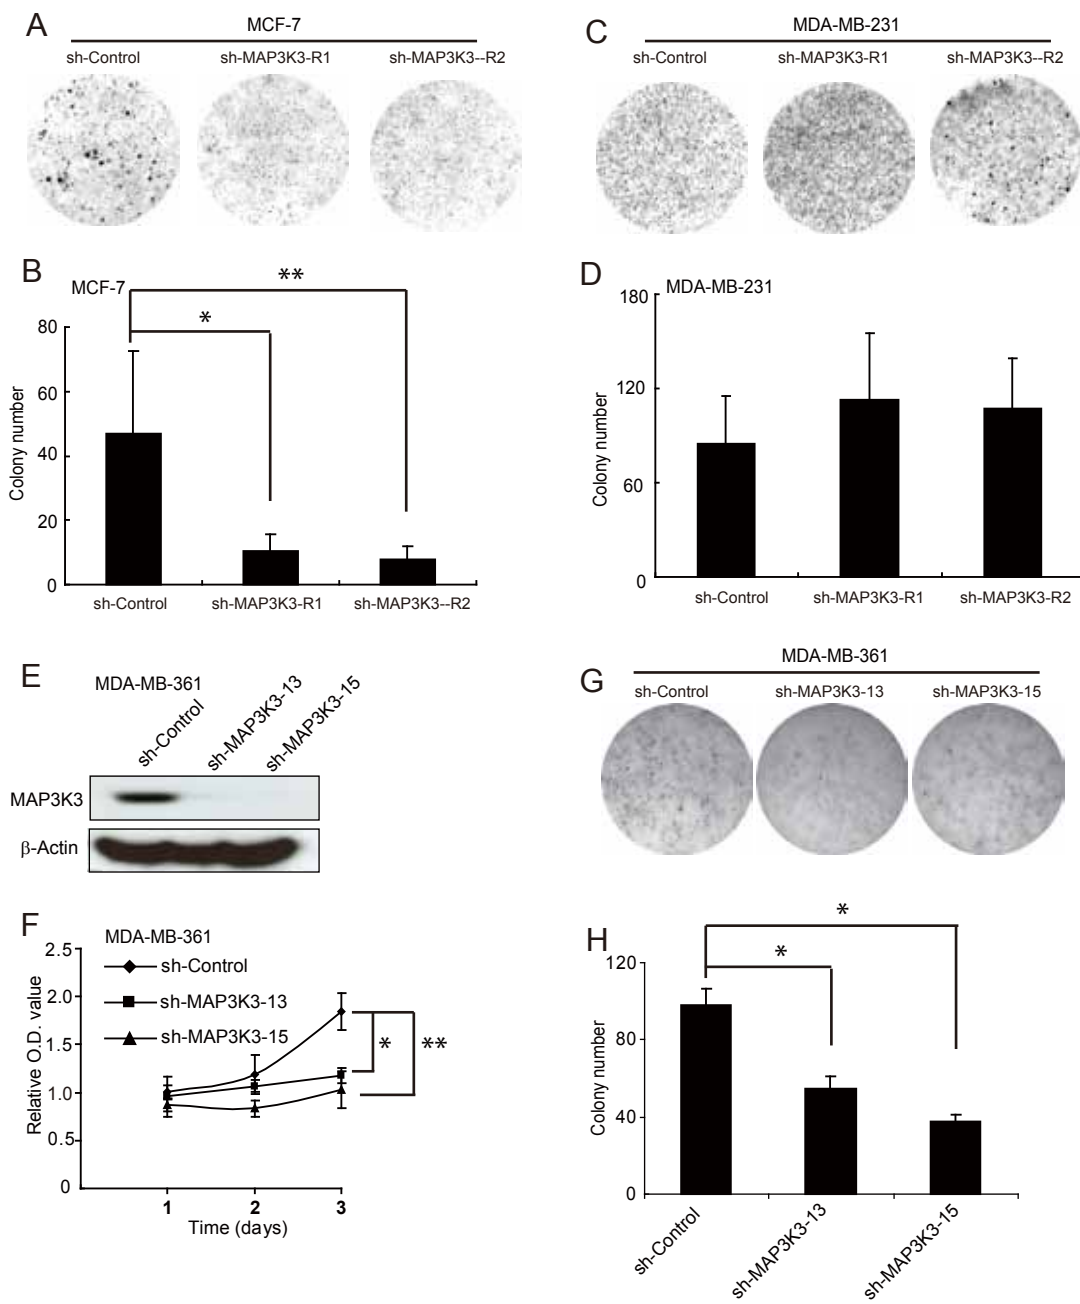

Figure S5

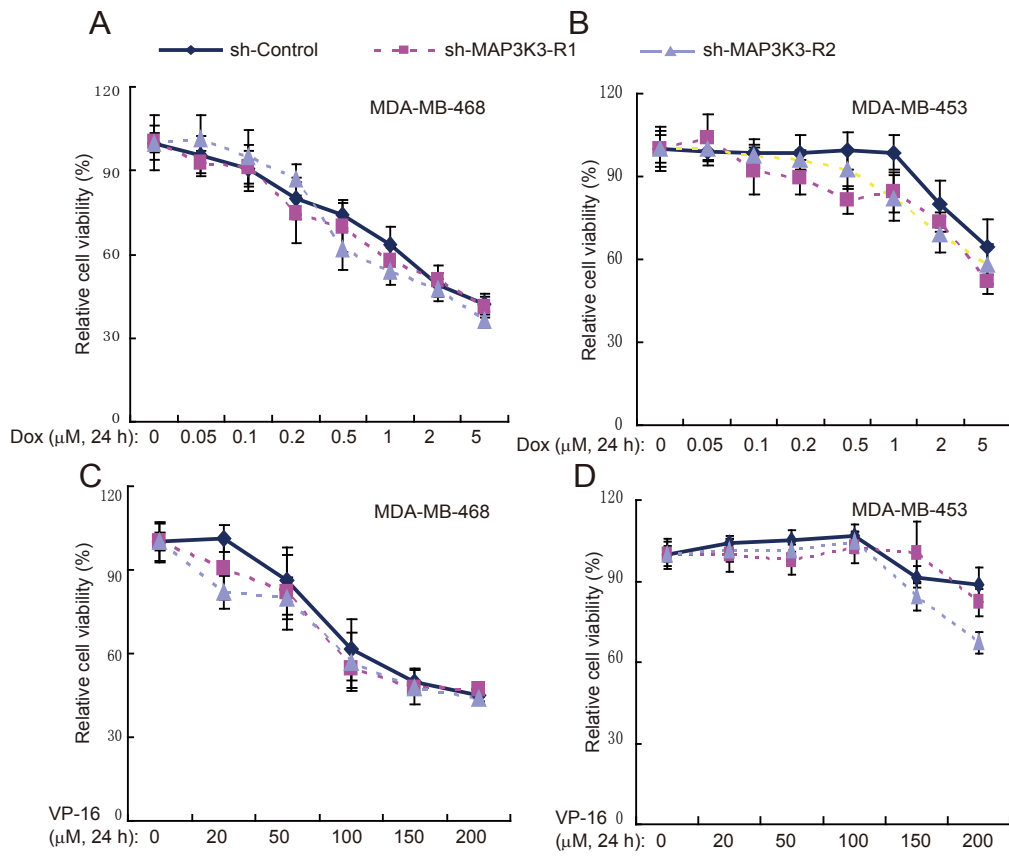

Supplement: NIHMS561900-supplement-Supplementary_data.pdf [file NIHMS561900-supplement-Supplementary_data.pdf]
